# Supplementary material for: MM quadruply bonded complexes supported by vinylbenzoate ligands: synthesis, characterization, photophysical properties and application as synthons
Source: Royal Society of Chemistry journal article supplement (doi:10.1039/c4sc02542c), 2015-01-01
Supplement: c4sc02542c1.pdf [file c4sc02542c1.pdf]

## SUPPORTING INFORMATION

### MM Quadruply Bonded Complexes Supported by Vinylbenzoate Ligands: Synthesis, Characterization, Photophysical Properties and Application as Synthons

5 **Samantha E. Brown-Xu, Malcolm H. Chisholm,\* Christopher B. Durr,  
Thomas F. Spilker and Philip J. Young**

#### Table of Contents

|    |                |                                                                         |
|----|----------------|-------------------------------------------------------------------------|
| 10 | S1 – S2.....   | NIR Emission                                                            |
|    | S3 – S13.....  | fs-Transient Absorption and kinetics                                    |
|    | S14 – S24..... | ns-Transient Absorption and kinetics                                    |
|    | S25.....       | fs-Time Resolved Infrared of <b>2B</b>                                  |
|    | S26.....       | Kinetic trace of <b>4A</b>                                              |
| 15 | S27 – S32..... | <sup>1</sup> H NMR in d <sub>8</sub> -THF at room temperature           |
|    | S33 – S38..... | High resolution MALDI-TOF Mass Spec                                     |
|    | S39.....       | Comparison of experimental and theoretical electronic transitions       |
|    | S40.....       | Crystallographic Data Collection Parameters for <b>1A</b> and <b>2A</b> |

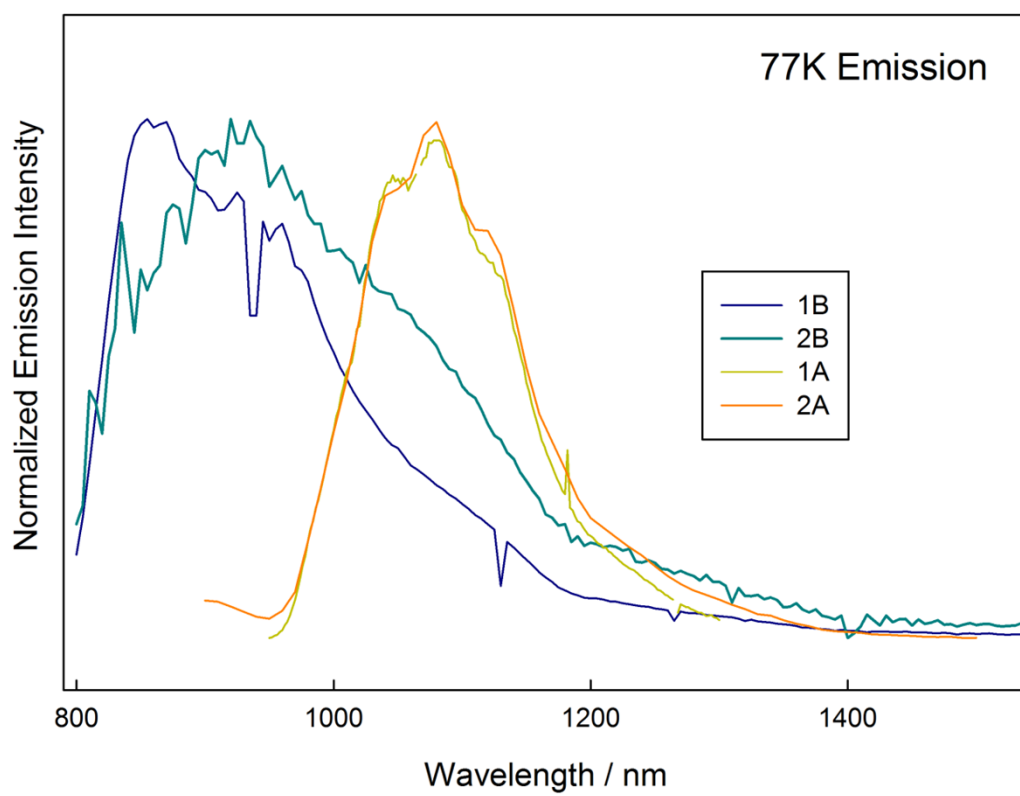

Figure S1. NIR emission of **1A**, **1B**, **2A**, and **2B** in 2-MeTHF at 77K.

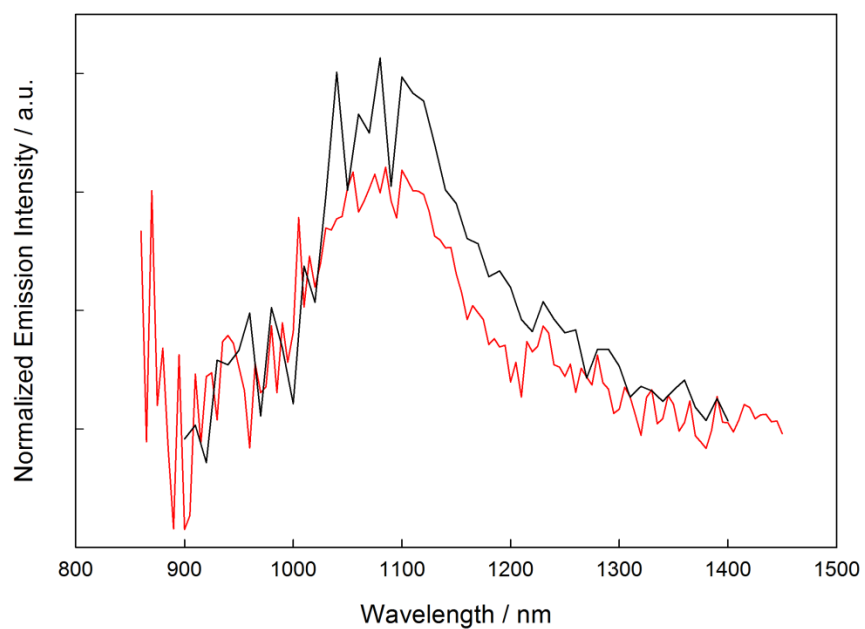

Figure S2. NIR emission of **3A** (black) and **4A** (red) in 2Me-THF at room temperature.

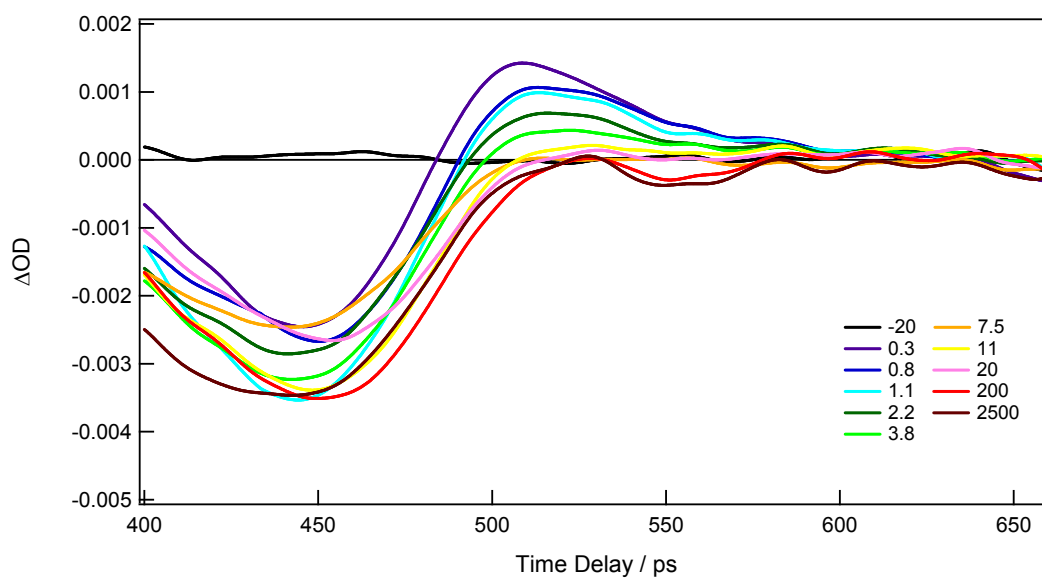

Figure S3. fsTA spectra of **1A** in THF with excitation at 350 nm.

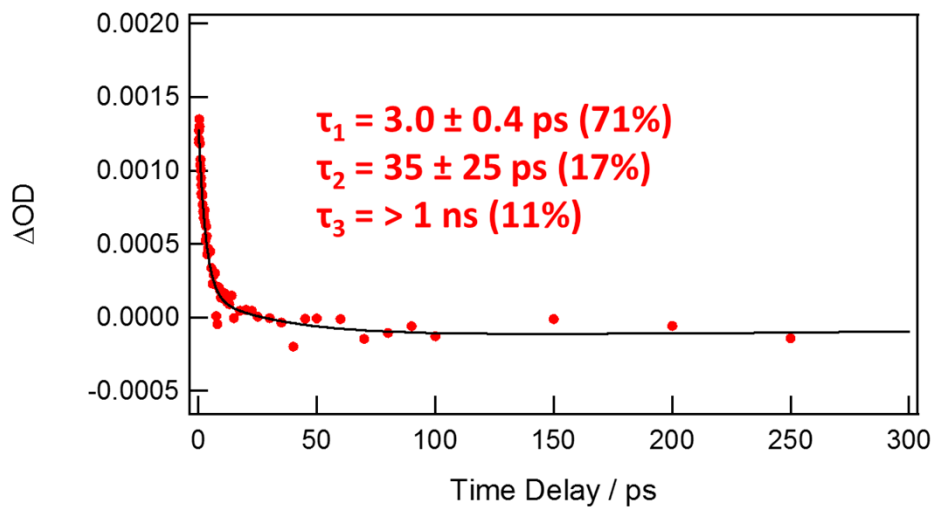

Figure S4. Kinetic trace from fsTA spectra of **1A** taken at 520 nm.

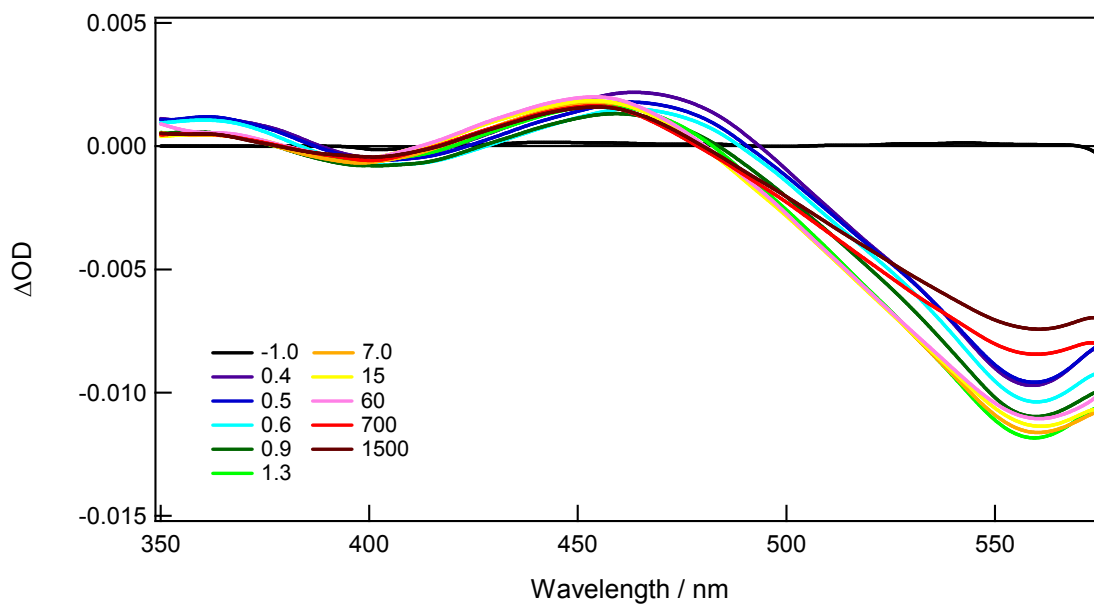

Figure S5. fsTA spectra of **1B** in THF with excitation at 600 nm.

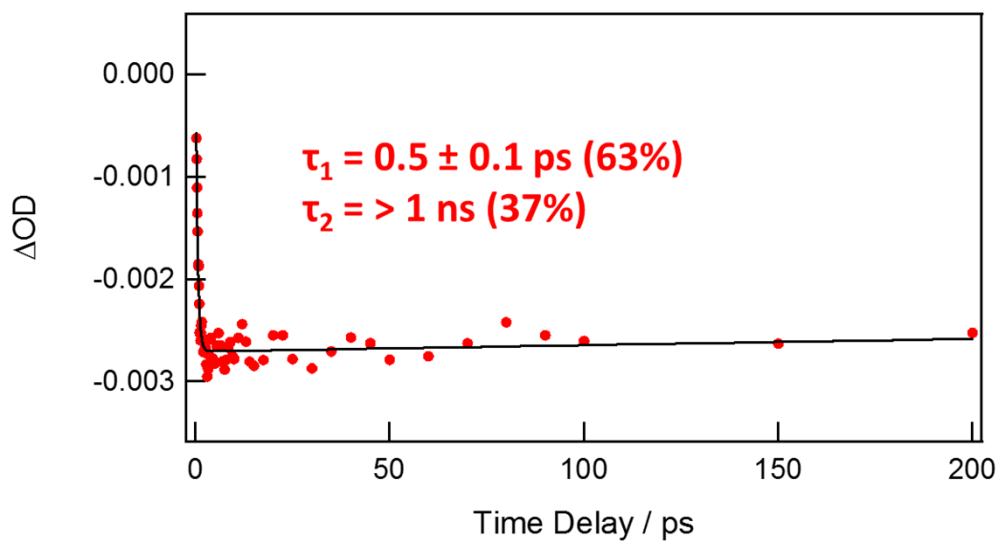

Figure S6. Kinetic trace from fsTA spectra of **1B** taken at 500 nm.

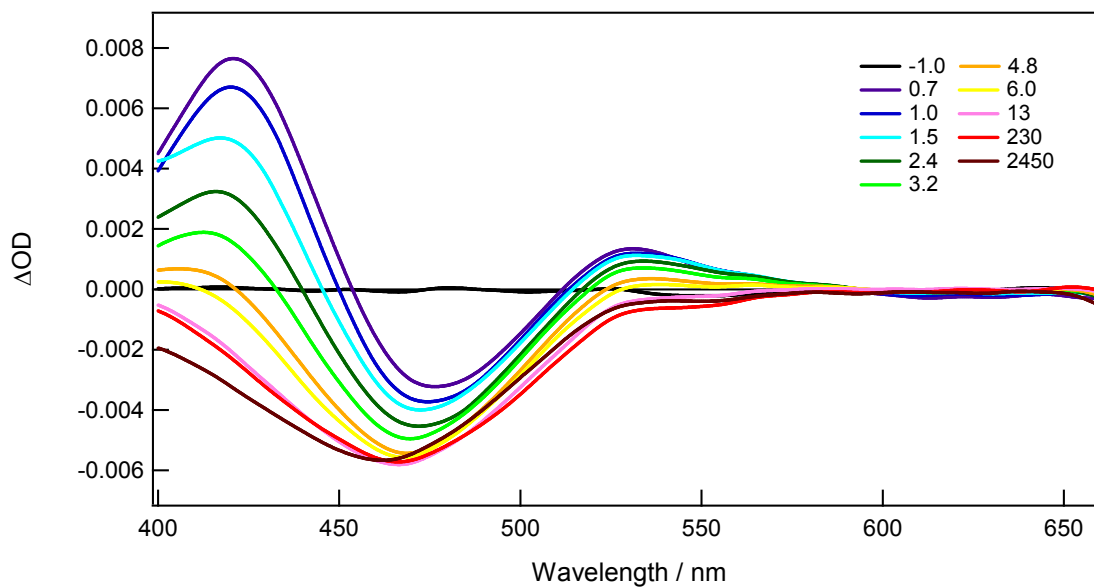

Figure S7. fsTA spectra of **2A** in THF with excitation at 350 nm.

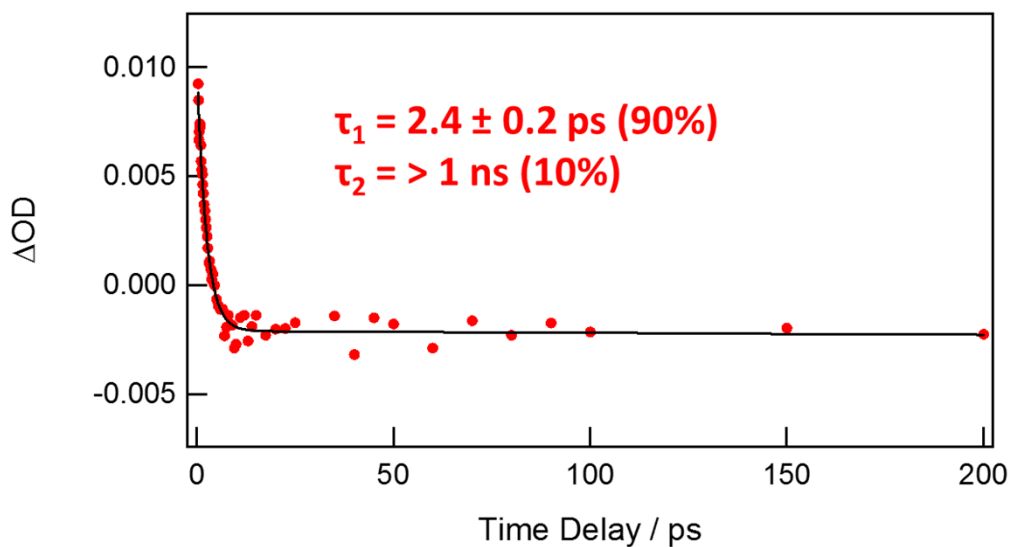

Figure S8. Kinetic trace from fsTA spectra of **2A** taken at 425 nm.

5

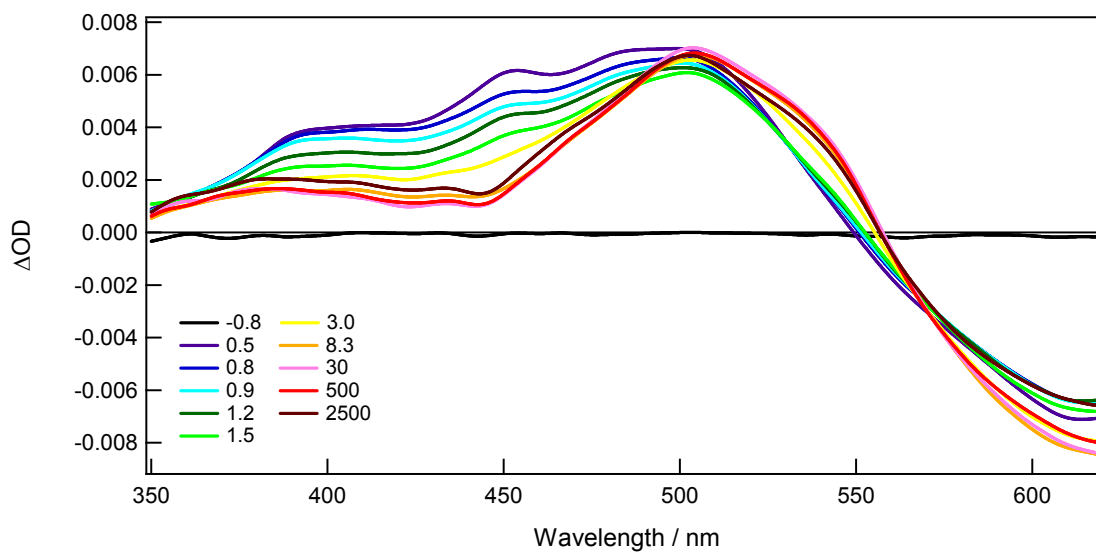

Figure S9. fsTA spectra of **2B** in THF with excitation at 675 nm.

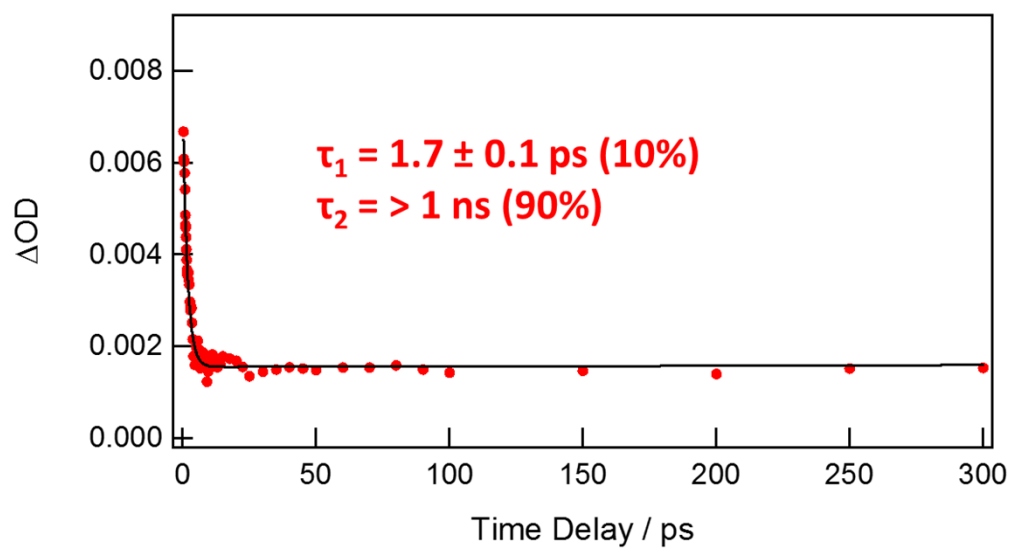

Figure S10. Kinetic trace from fsTA spectra of **2B** taken at 450 nm.

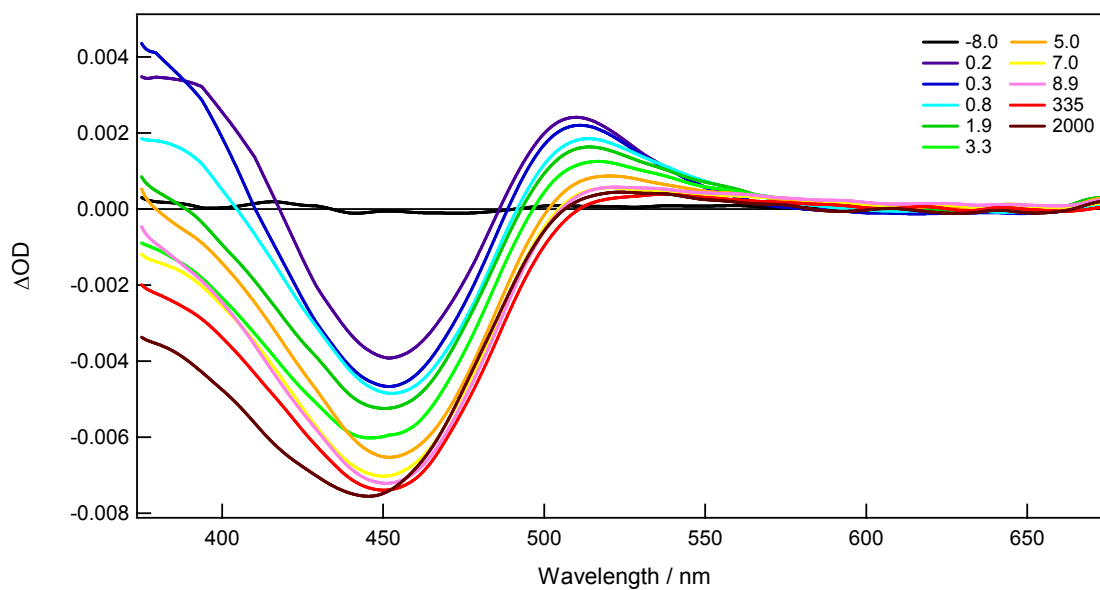

Figure S11. fsTA spectra of **3A** in THF with excitation at 350nm.

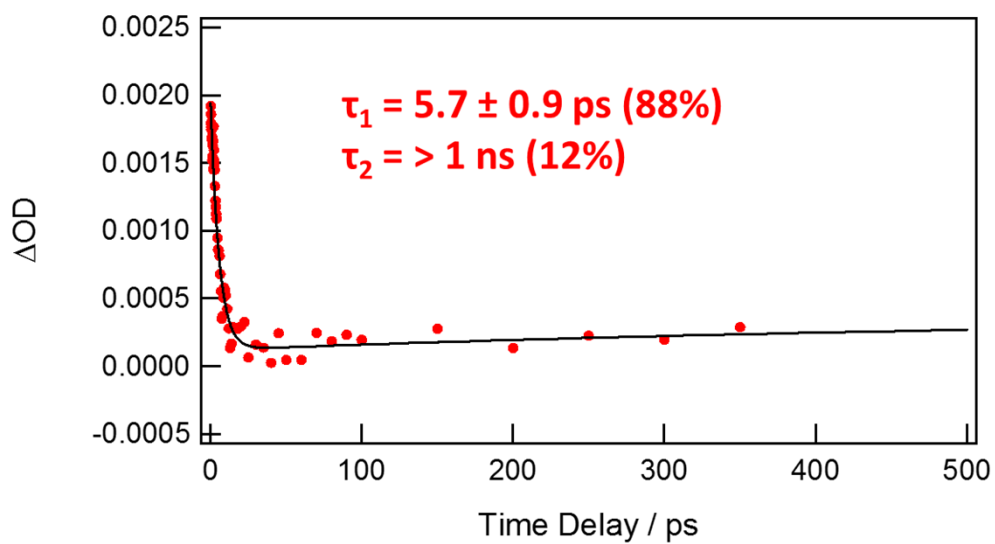

Figure S12. Kinetic trace from fsTA spectra of **3A** taken at 520 nm.

5

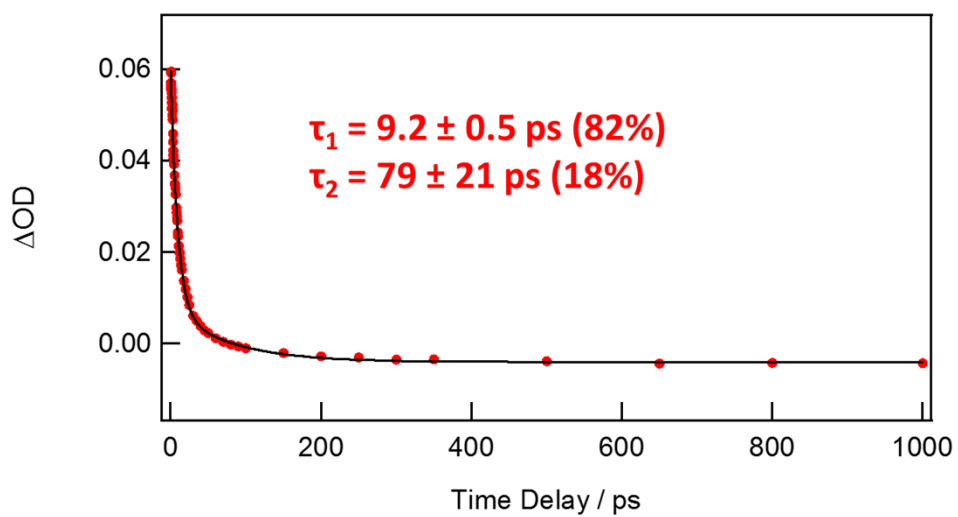

Figure S13. Kinetic trace from fsTA spectra of **4A** taken at 560 nm.



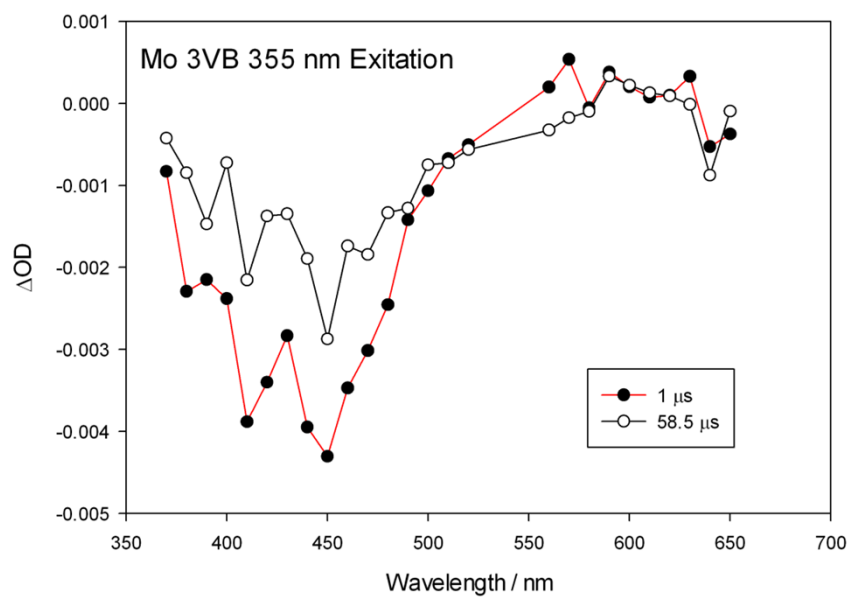

Figure S14. nsTA spectra of **1A** in THF with excitation at 355 nm.

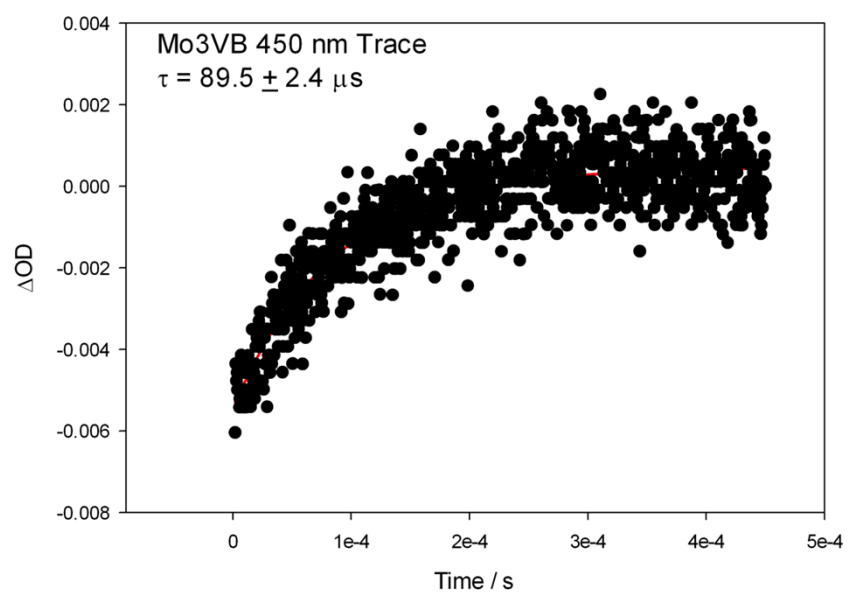

5

Figure S15. Kinetic trace from nsTA spectra of **1A** taken at 540 nm.

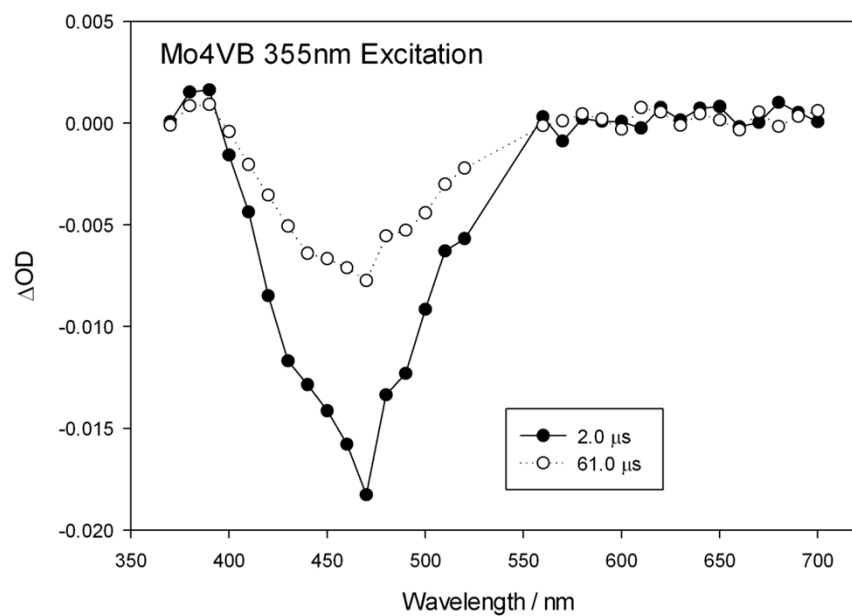

Figure S16. nsTA spectra of **2A** in THF with excitation at 355 nm.

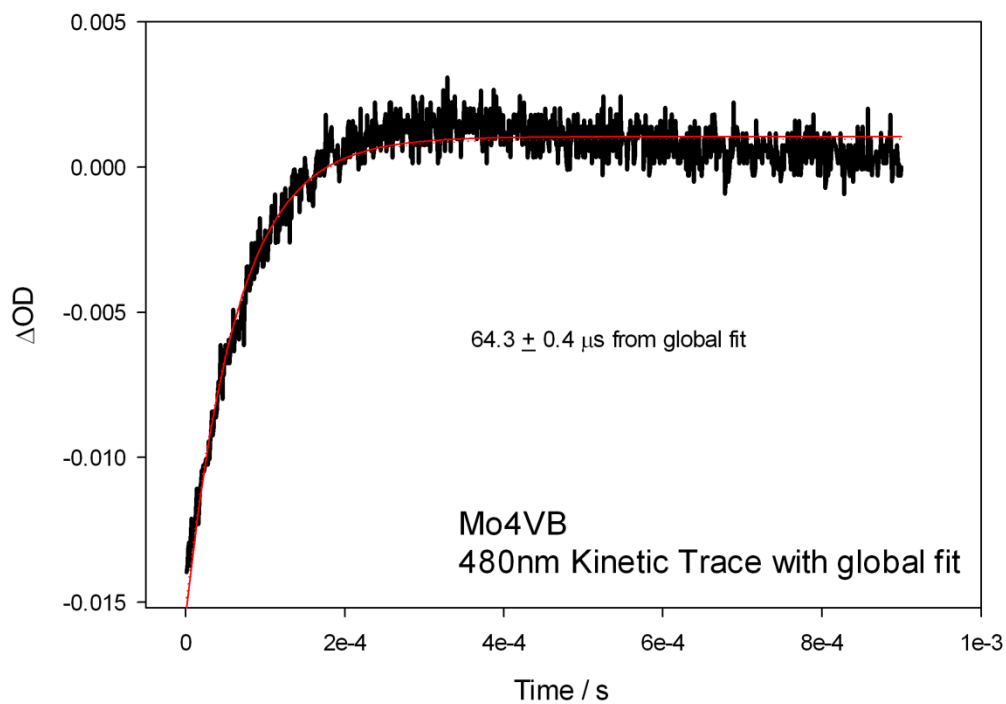

Figure S17. Kinetic trace from nsTA spectra of **2A** taken at 480 nm.

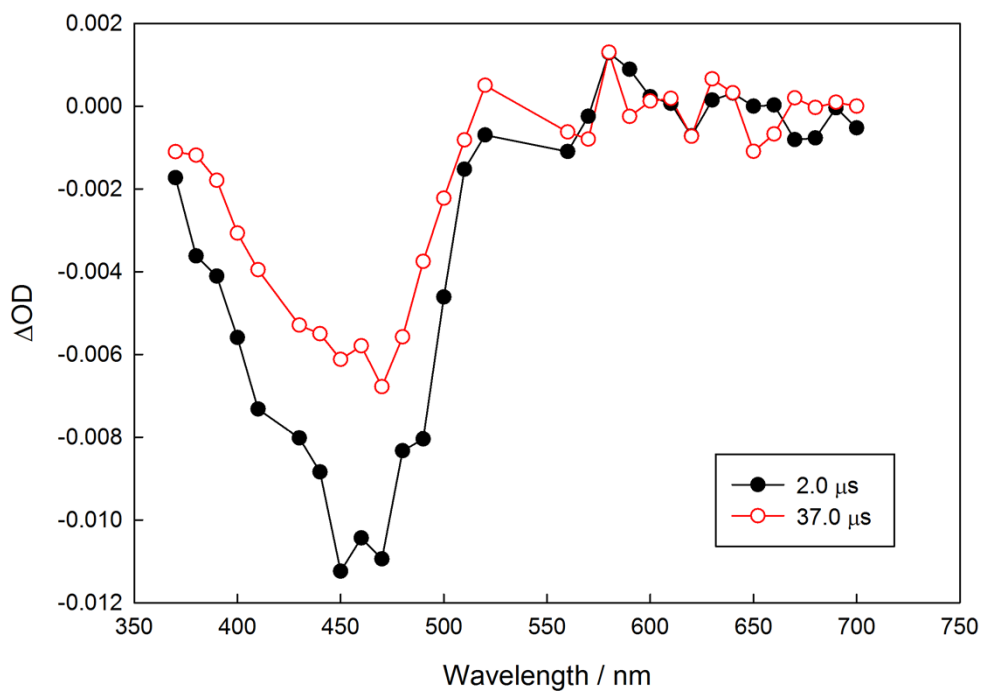

Figure S18. nsTA spectra of **3A** in THF with excitation at 355 nm.

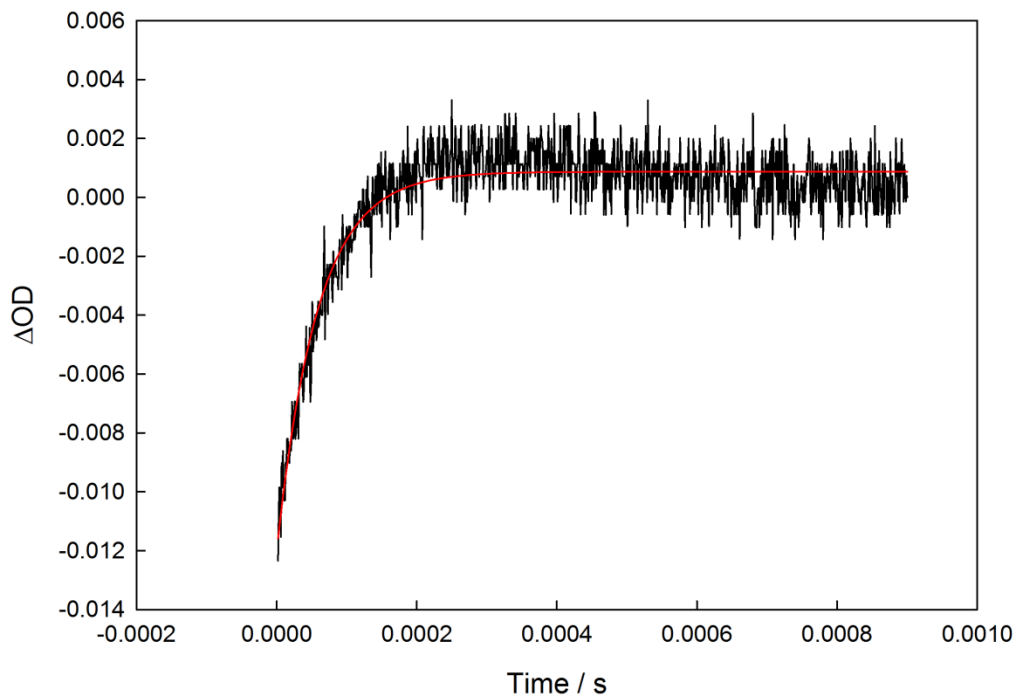

Figure S19. Kinetic trace from nsTA spectra of for **3A** taken at 480 nm.

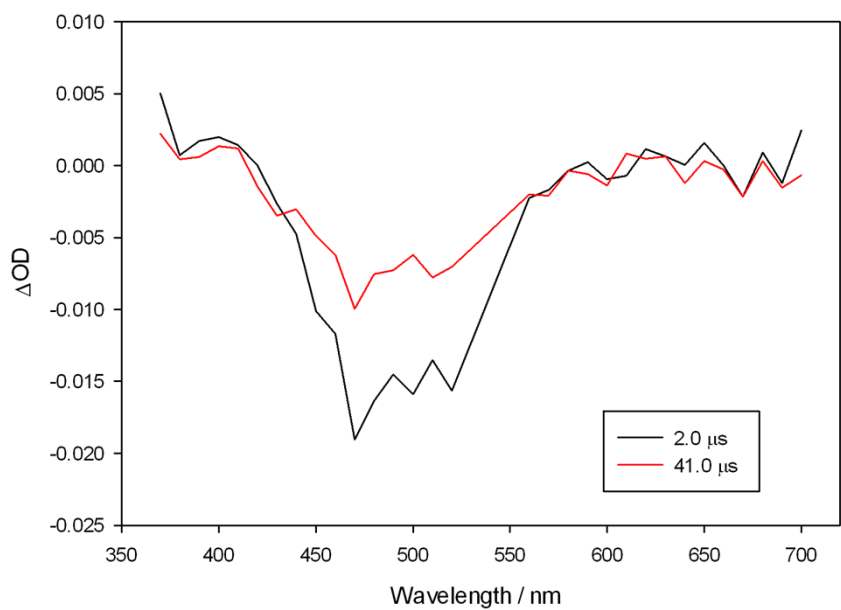

Figure S20. nsTA spectra of **4A** in THF with excitation at 355 nm.

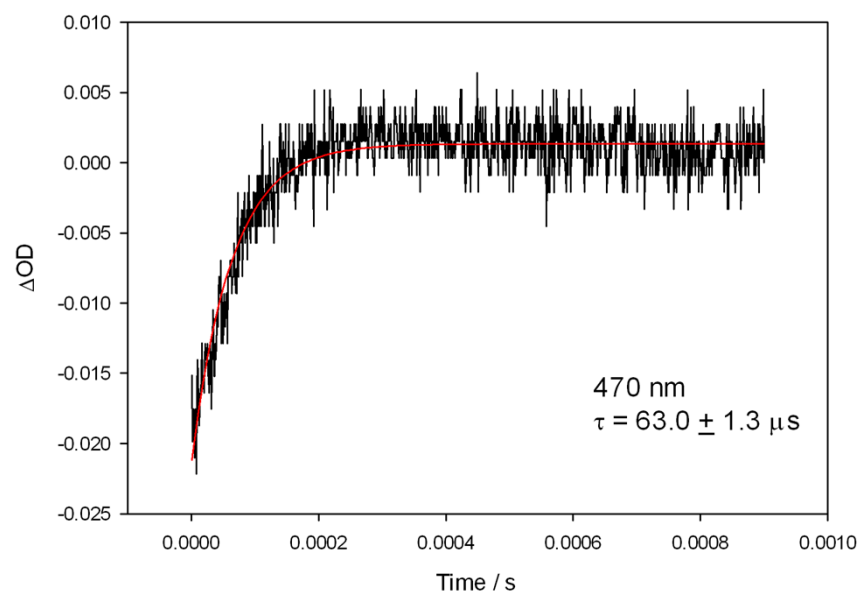

Figure S21. Kinetic trace from nsTA spectra of **4A** taken at 470 nm.

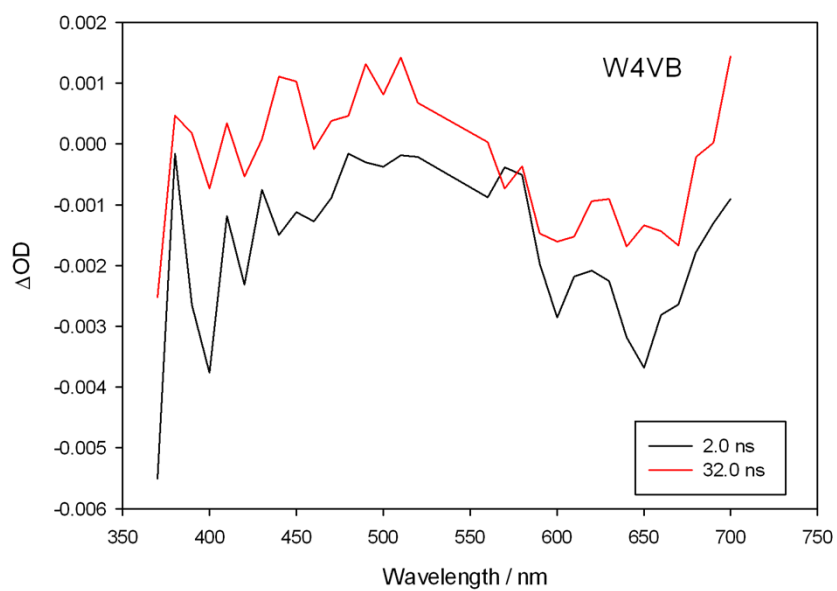

Figure S22. nsTA spectra of **2B** in THF with excitation at 355 nm.

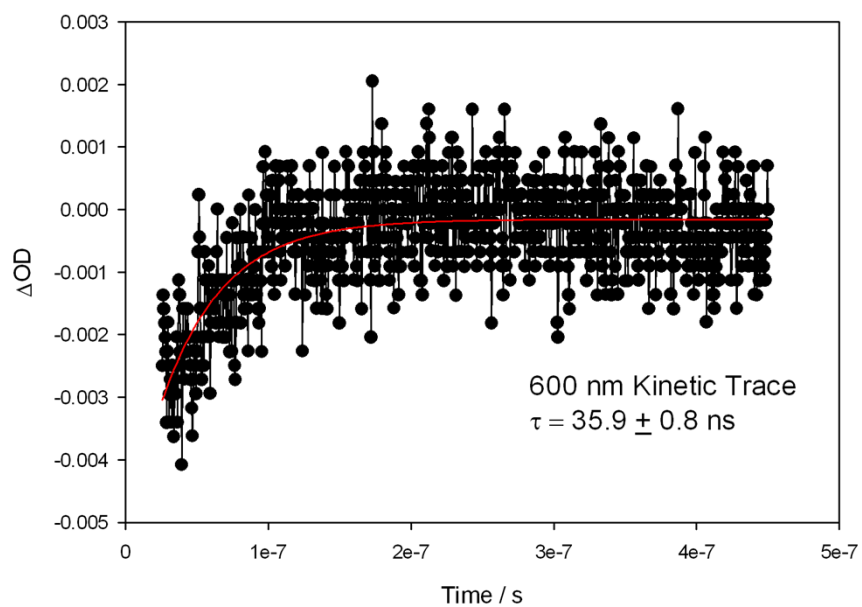

5

Figure S23. Kinetic trace from nsTA spectra of **2B** taken at 600 nm.

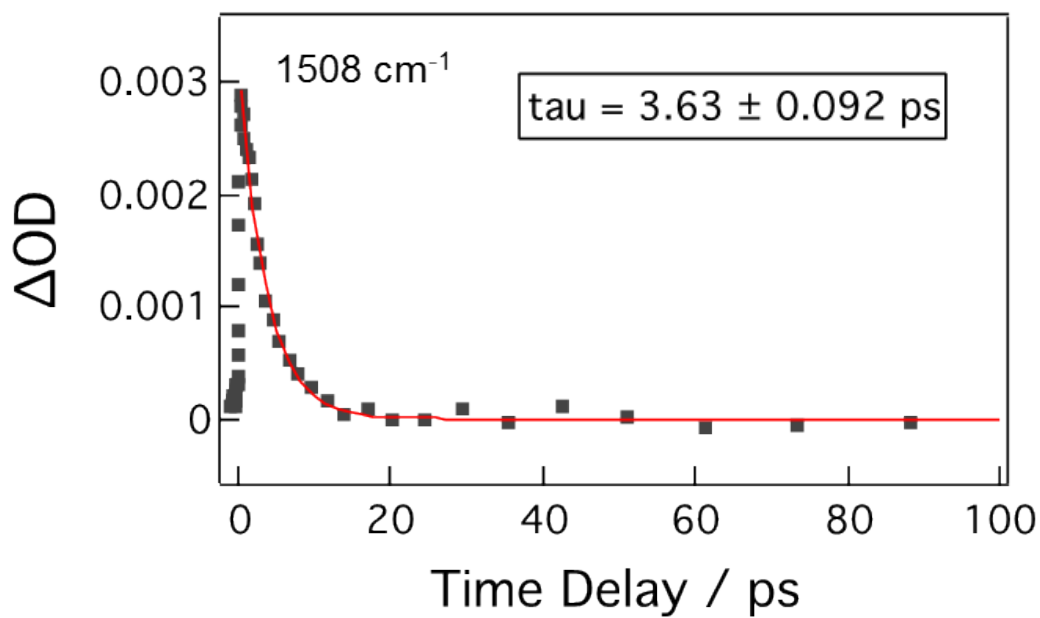

Figure S24. Kinetic trace from fsTRIR spectra of **2A** taken at 1508  $\text{cm}^{-1}$ .

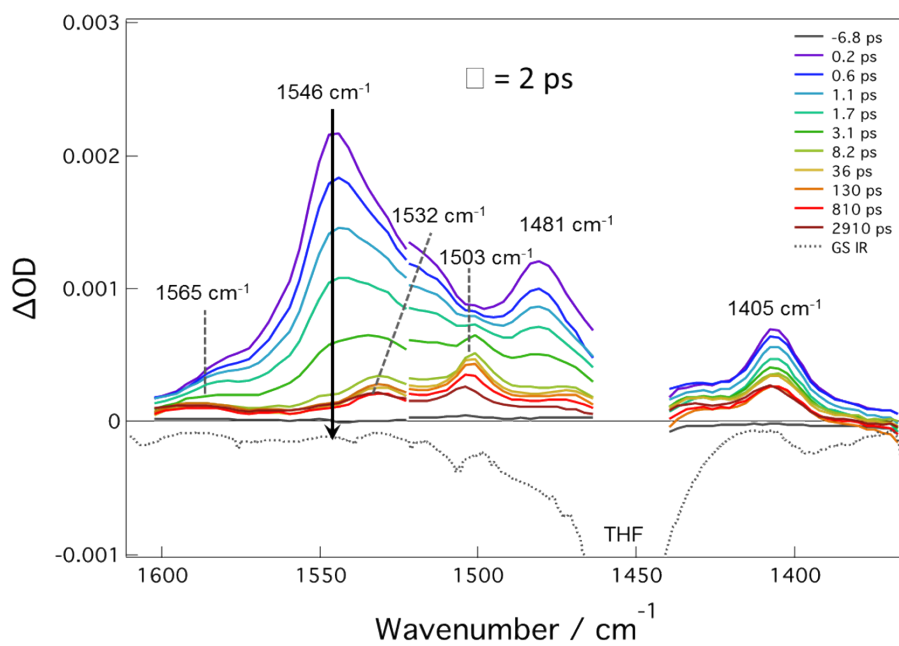

Figure S25. fsTRIR spectra of **2B** in THF with excitation at 675 nm.

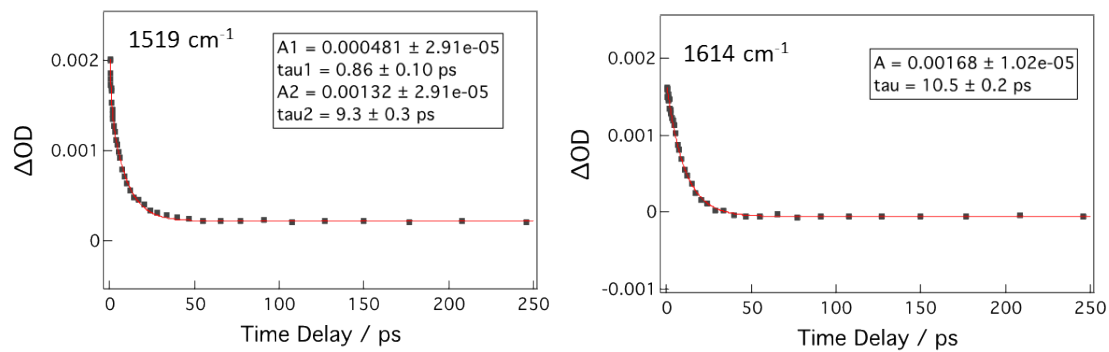

Figure S26. Kinetic traces from fsTRIR spectra of **4A** taken at 1519 and 1614  $\text{cm}^{-1}$ .

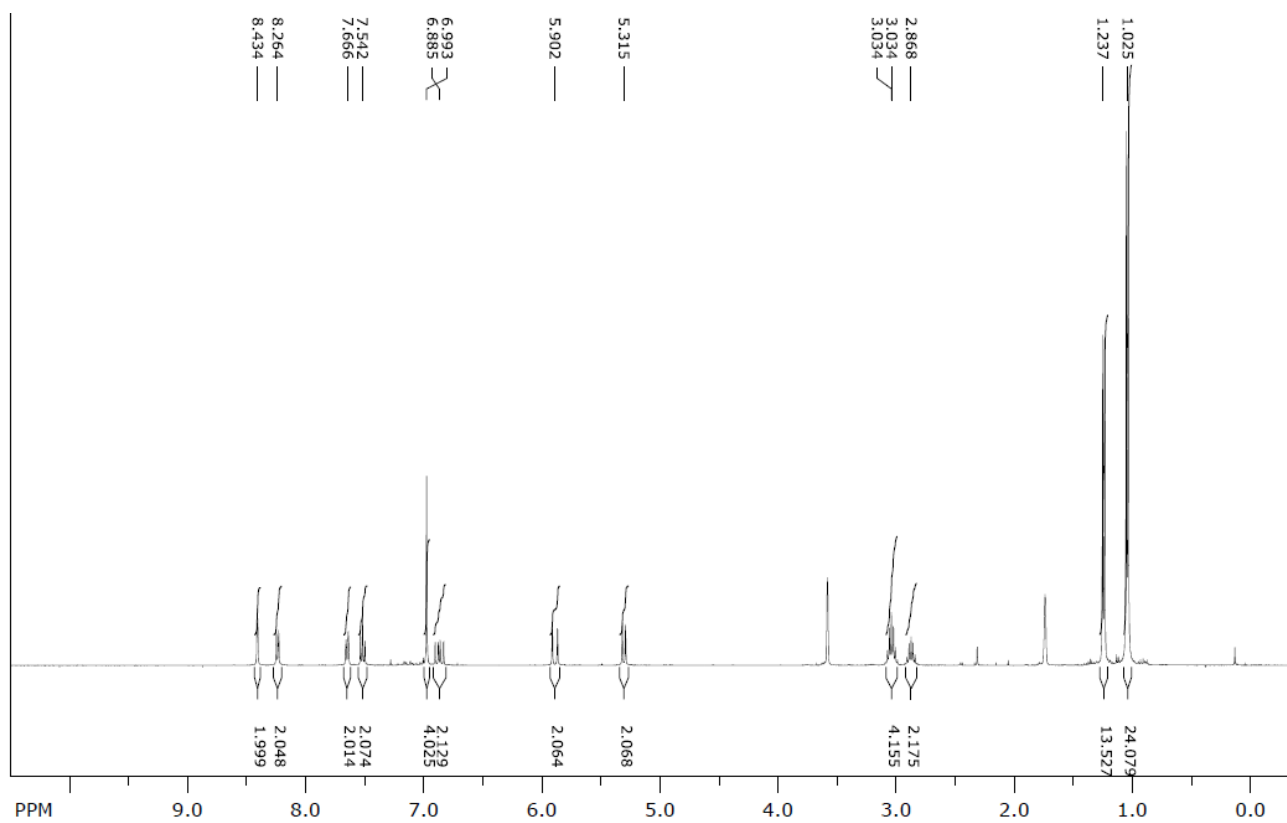

Figure S27.  $^1\text{H}$  NMR of **1A** in  $d_8$ -THF (residual peaks: 3.58 and 1.73 ppm) at room temperature.



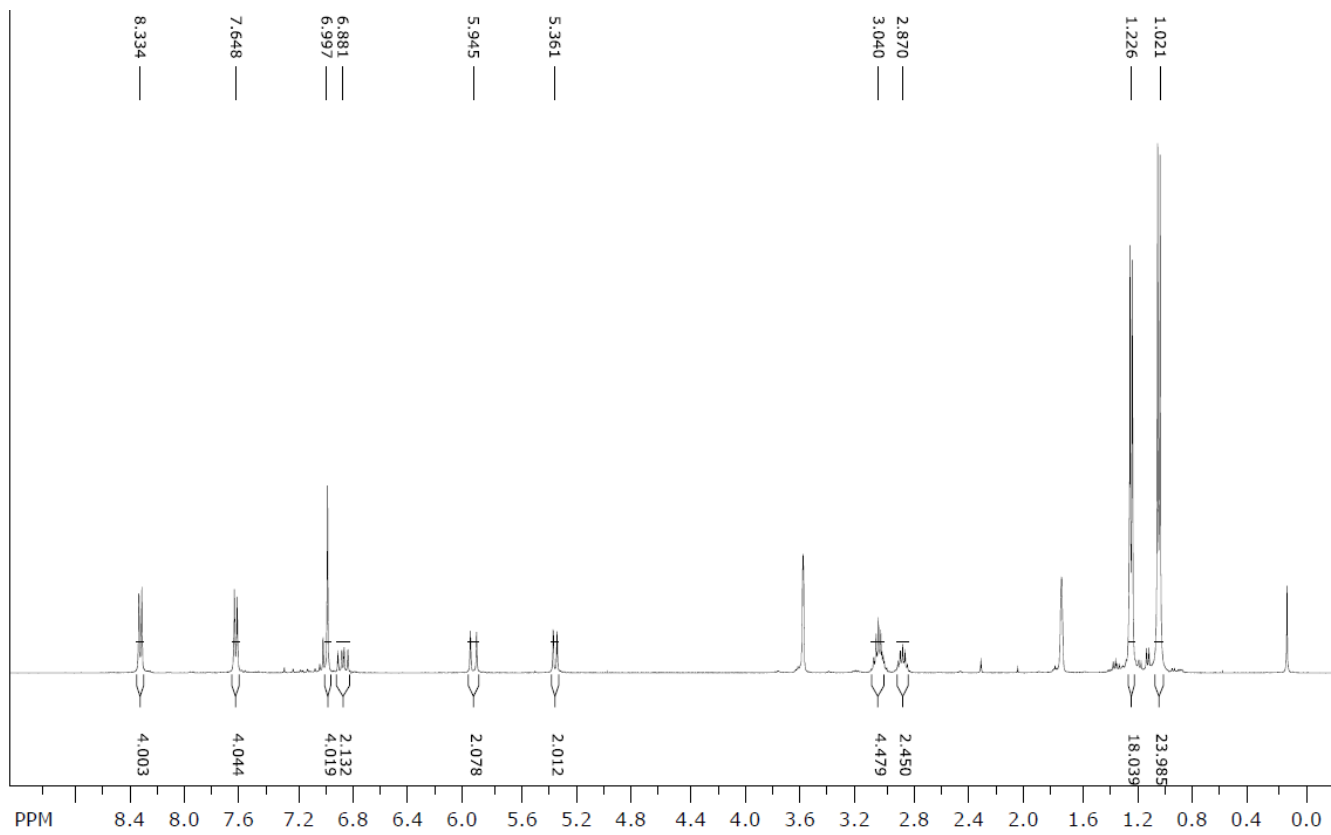

Figure S28. <sup>1</sup>H NMR of **2A** in d<sub>8</sub>-THF (residual peaks: 3.58 and 1.73 ppm) at room temperature.

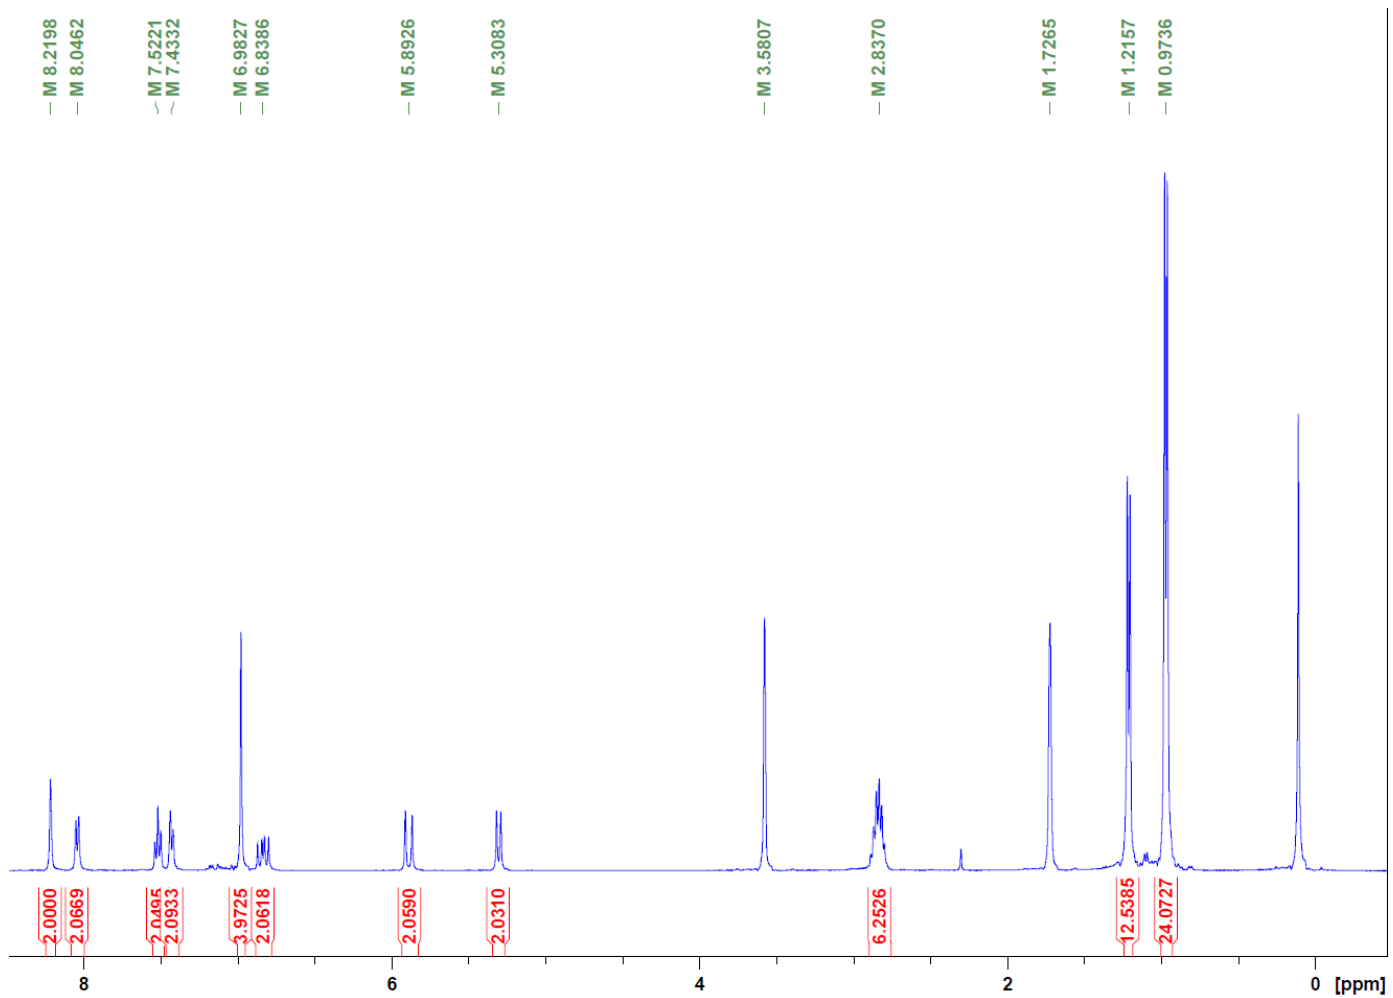

Figure S29 <sup>1</sup>H NMR of **1B** in d<sub>8</sub>-THF (residual peaks: 3.58 and 1.73 ppm) at room temperature.

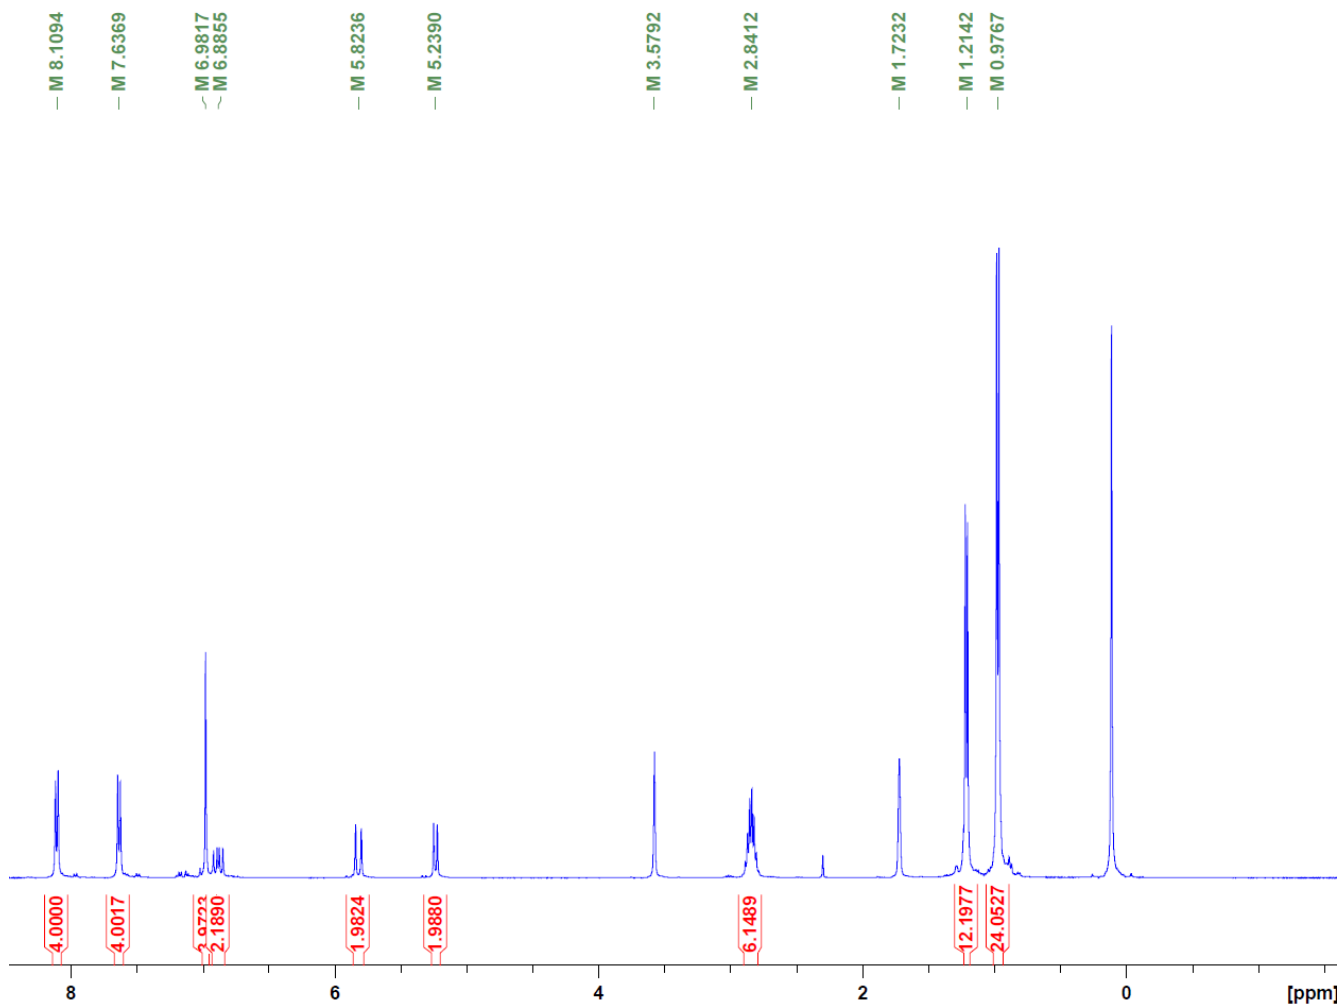

Figure S30.  $^1\text{H}$  NMR of **2B** in  $d_8$ -THF (residual peaks: 3.58 and 1.73 ppm) at room temperature.

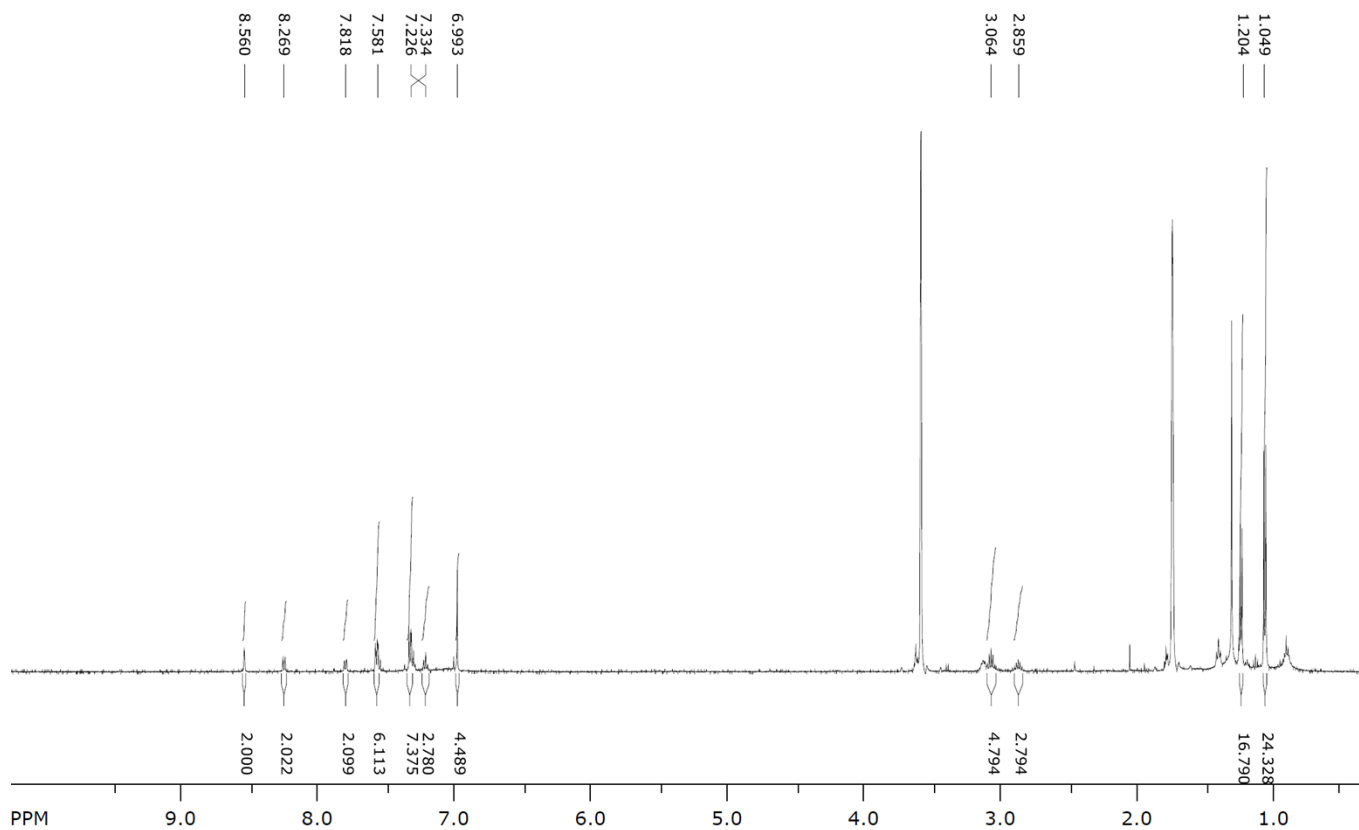

Figure S31.  $^1\text{H}$  NMR of **3A** in  $d_8$ -THF (residual peaks: 3.58 and 1.73 ppm) at room temperature. Small amounts of the catalyst,  $\text{Pd}(\text{O}_2\text{Ac})_2$ , can also be seen in the spectra.

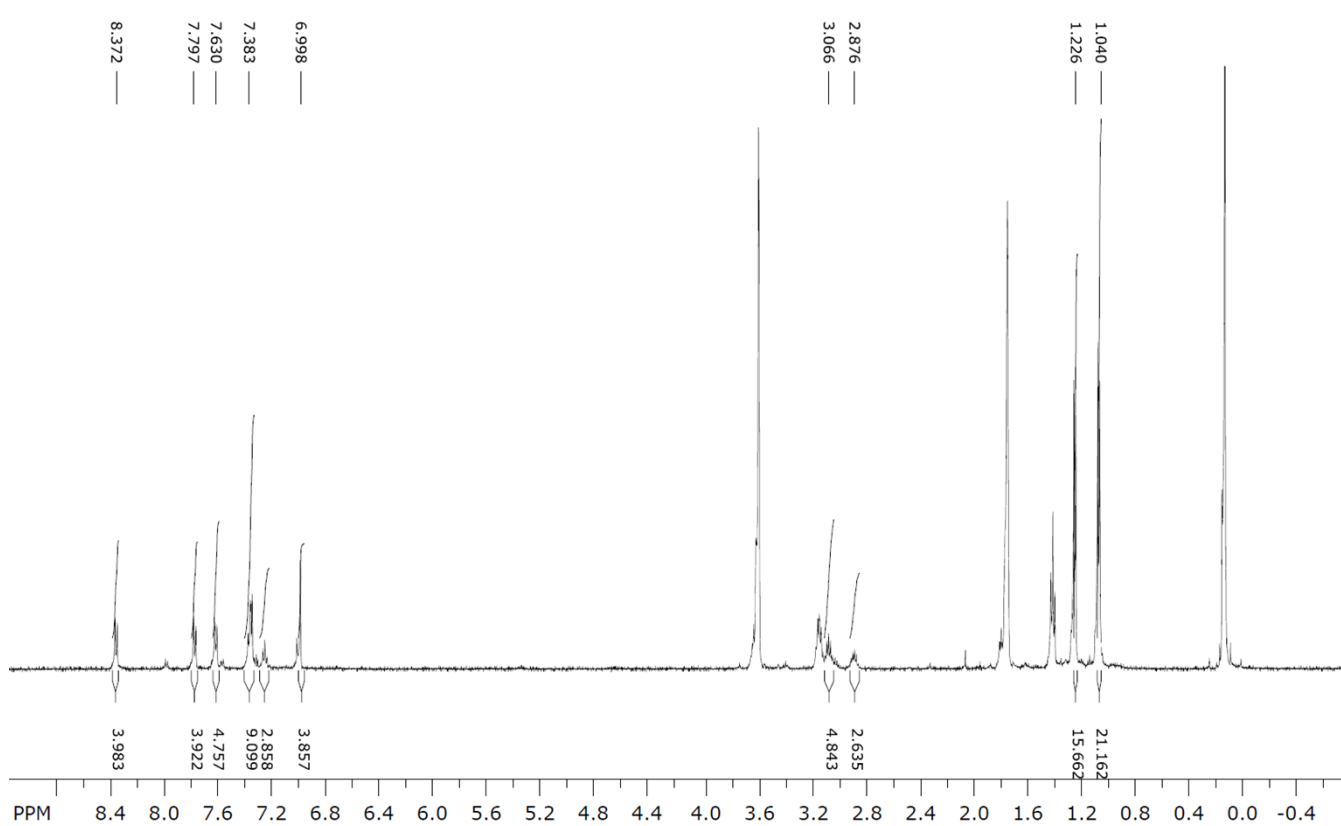

Figure S32.  $^1\text{H}$  NMR of **4A** in  $d_8$ -THF (residual peaks: 3.58 and 1.73 ppm) at room temperature. Small amounts of the base  $\text{N}(\text{Et})_3$  can also be seen in the spectrum.

Figure S33 High resolution MALDI-MS of 1A.

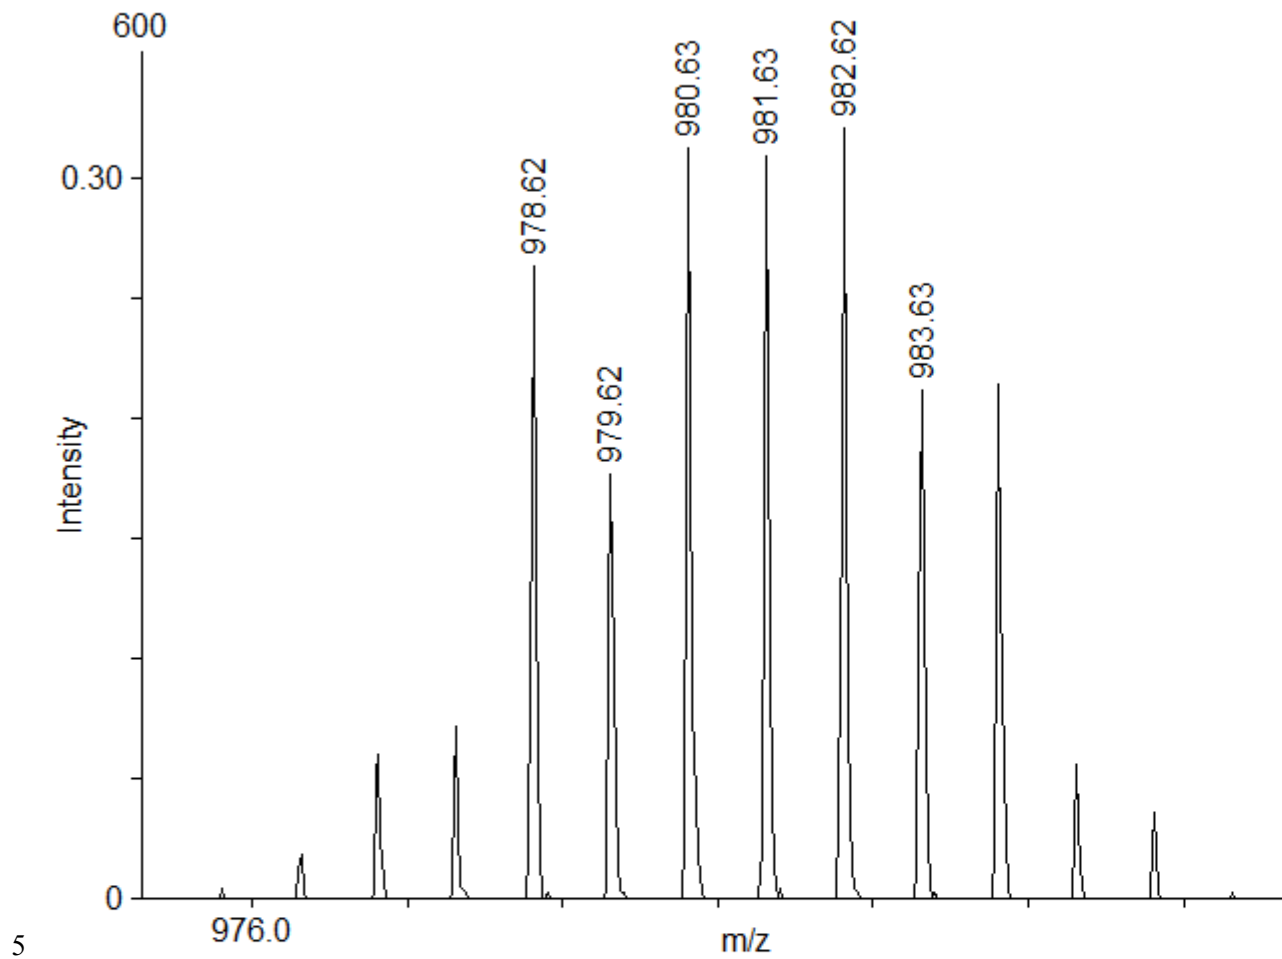

Figure S34 High resolution MALDI-MS of **1B**.

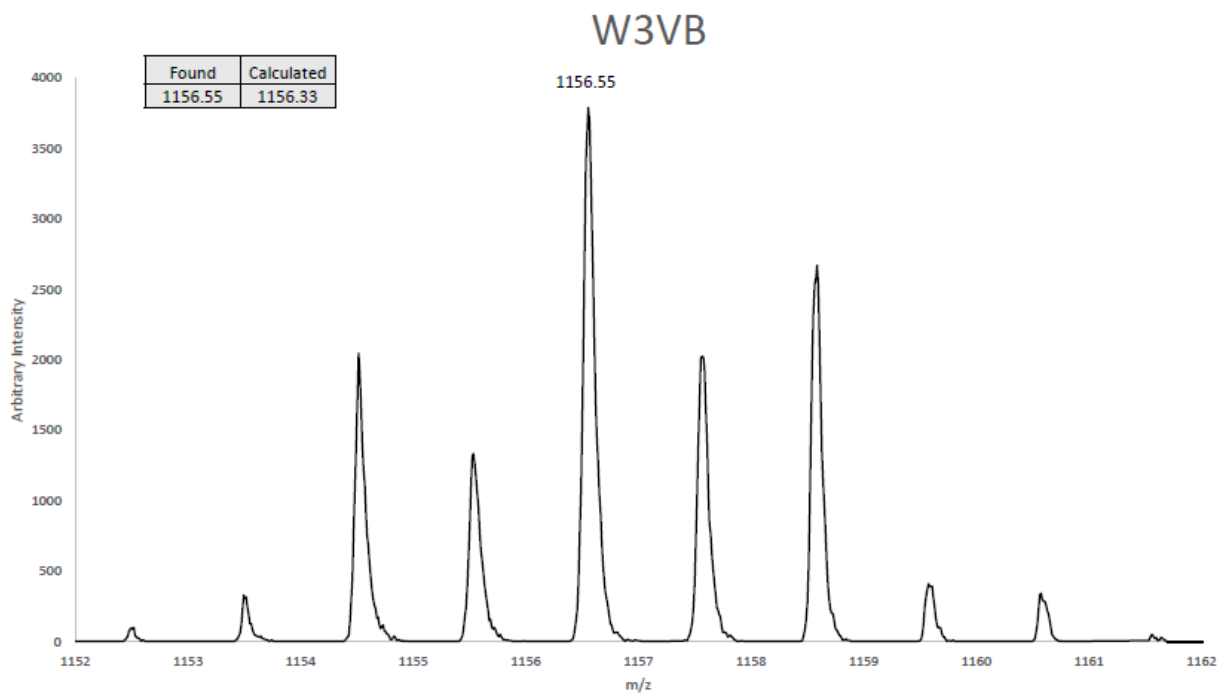

Figure S35 High resolution MALDI-MS of **2A**.

5

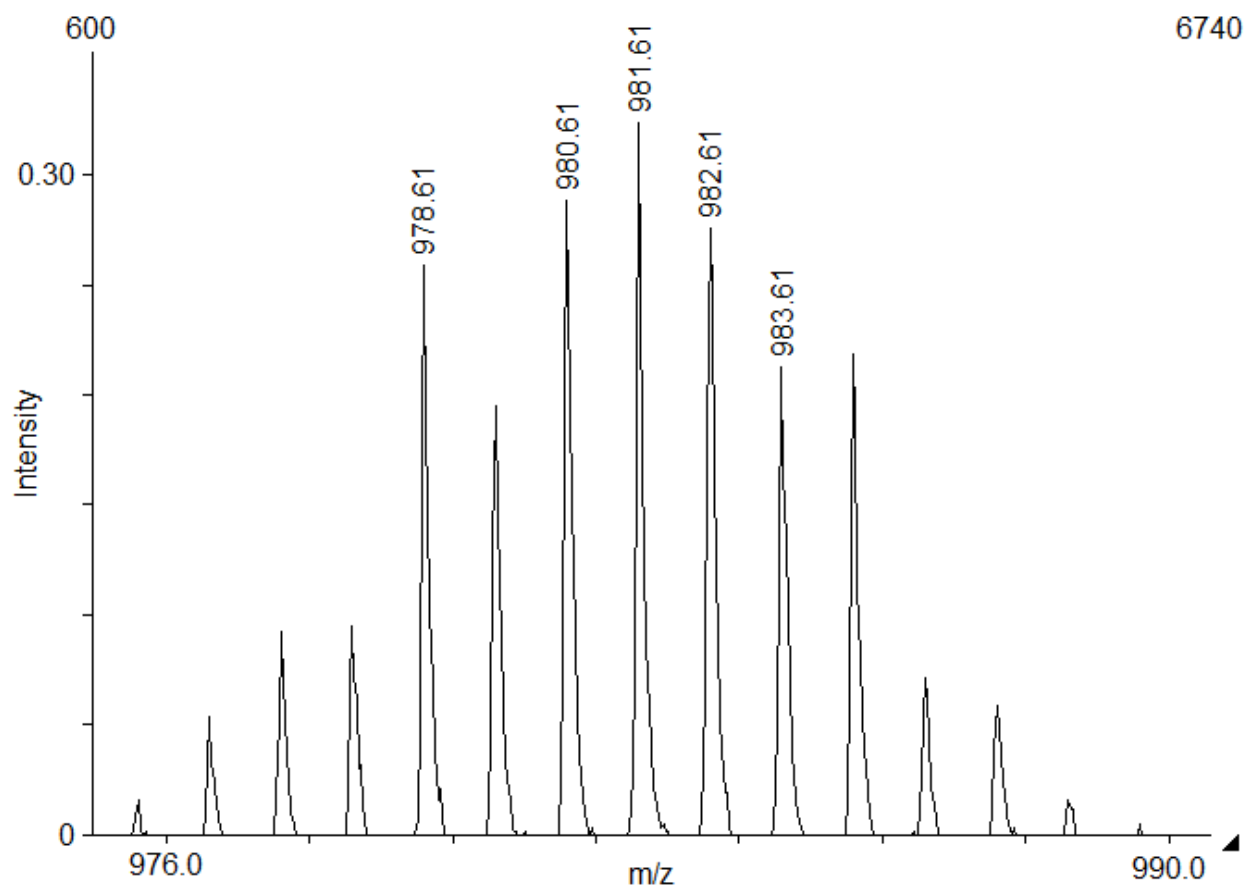

6740



Figure S36 High resolution MALDI-MS of **2B**.

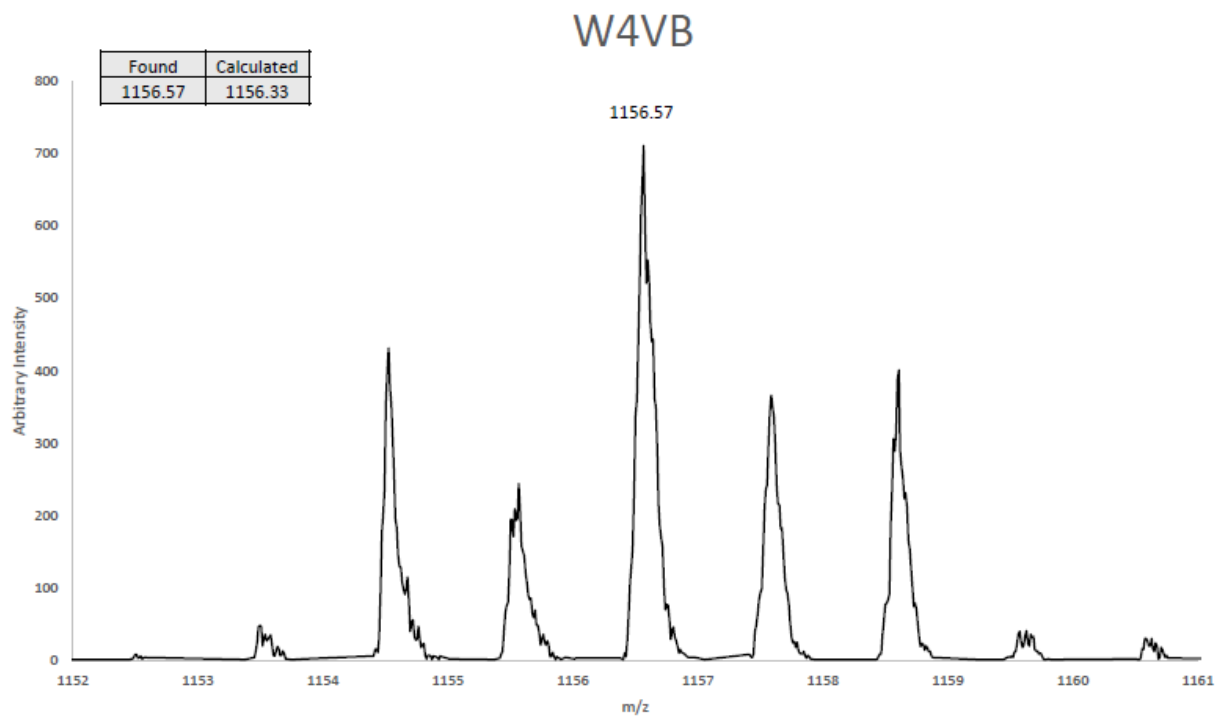

Figure S37 High resolution MALDI-MS of **3A**.

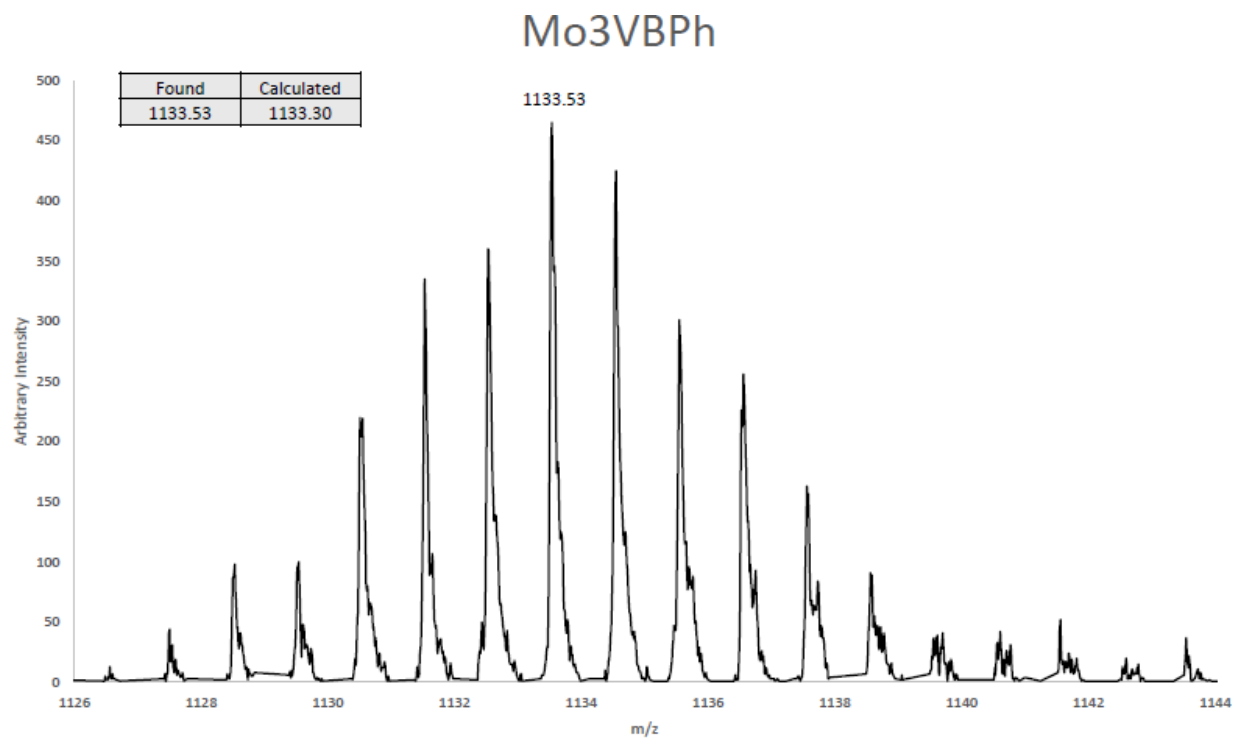

Figure S38 High resolution MALDI-MS of **4A**.

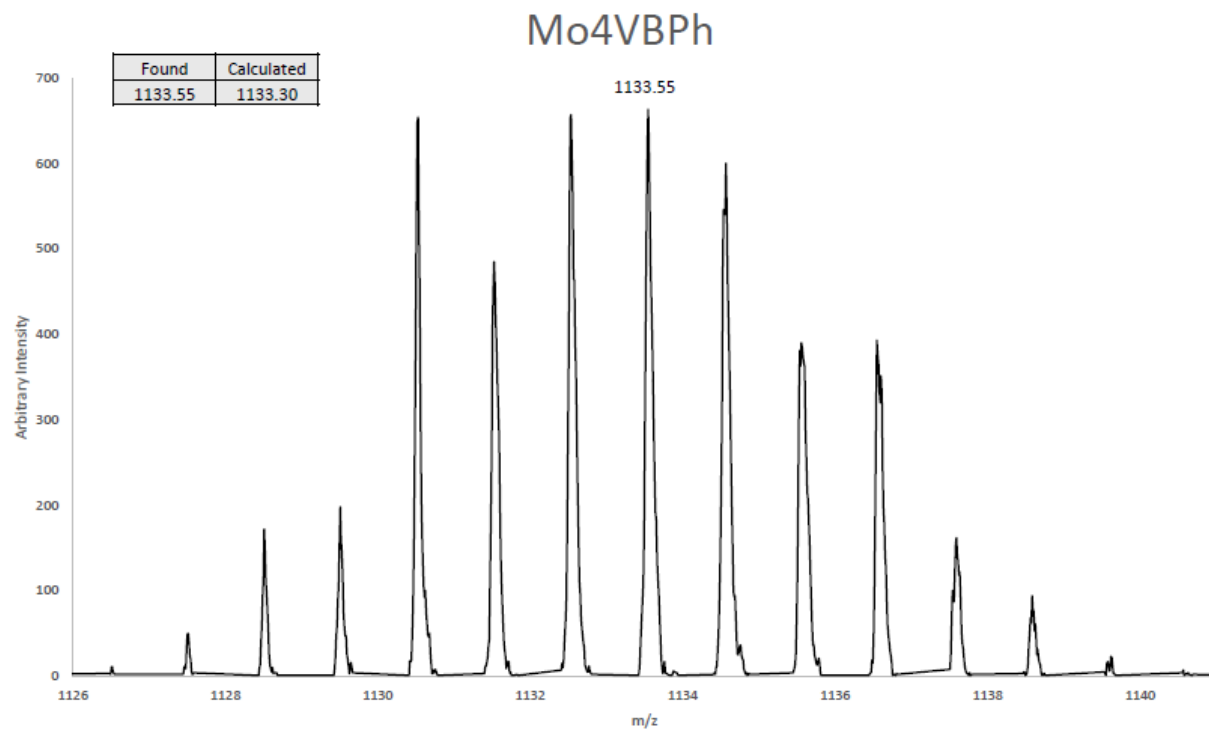

Table S39. Comparison of experimental and theoretical electronic transitions.

| Compound  | Transition                                   | Experimental Absorption | Calculated Absorption (Oscillator Strength) | Orbital Contribution                              |
|-----------|----------------------------------------------|-------------------------|---------------------------------------------|---------------------------------------------------|
| <b>1A</b> | <sup>1</sup> MLCT (Mo <sub>2</sub> → T'PB)   | 337 nm                  | 308 nm (0.1124)                             | HOMO → LUMO+8                                     |
|           | <sup>1</sup> MLCT (Mo <sub>2</sub> → 3-VB)   | 437 nm                  | 424 nm (0.5379)                             | HOMO → LUMO+1                                     |
| <b>1B</b> | <sup>1</sup> MLCT (W <sub>2</sub> → T'PB)    | 401 nm                  | 347 nm (0.1526)                             | HOMO → LUMO+6                                     |
|           | <sup>1</sup> MLCT (W <sub>2</sub> → 3-VB)    | 563, 601 nm             | 495 nm (0.6684)                             | HOMO → LUMO                                       |
| <b>2A</b> | <sup>1</sup> MLCT (Mo <sub>2</sub> → T'PB)   | 335 nm                  | 309 nm (0.1099)                             | HOMO → LUMO+6                                     |
|           | <sup>1</sup> MLCT (Mo <sub>2</sub> → 4-VB)   | 467 nm                  | 459 nm (0.7307)                             | HOMO → LUMO                                       |
| <b>2B</b> | <sup>1</sup> MLCT (W <sub>2</sub> → T'PB)    | 405 nm                  | 349 nm (0.1488)                             | HOMO → LUMO+4                                     |
|           | <sup>1</sup> MLCT (W <sub>2</sub> → 4-VB)    | 605, 652 nm             | 537 nm (0.8937)                             | HOMO → LUMO                                       |
| <b>3A</b> | <sup>1</sup> MLCT (Mo <sub>2</sub> → T'PB)   | 318 nm                  | 298 nm (0.1136)                             | HOMO → LUMO+8                                     |
|           | <sup>1</sup> MLCT (Mo <sub>2</sub> → 3-VBPh) | 427 nm                  | 373 nm (0.2926)<br>434 nm (0.5829)          | HOMO → LUMO<br>HOMO → LUMO+1<br>HOMO → LUMO+3     |
| <b>4A</b> | <sup>1</sup> MLCT (Mo <sub>2</sub> → T'PB)   | 318 nm                  | 345 nm (1.3354)                             | HOMO → LUMO+6<br>HOMO-1 → LUMO+1<br>HOMO-2 → LUMO |
|           | <sup>1</sup> MLCT (Mo <sub>2</sub> → 4-VBPh) | 486 nm                  | 498 nm (1.2129)                             | HOMO → LUMO                                       |

Table S40. Crystallographic Data Collection Parameters for **1A** and **2A**

| Compound                                         | <b>1A</b>                                                       | <b>2A</b>                                                       |
|--------------------------------------------------|-----------------------------------------------------------------|-----------------------------------------------------------------|
| Chemical Formula                                 | C <sub>58</sub> H <sub>76</sub> Mo <sub>2</sub> O <sub>10</sub> | C <sub>58</sub> H <sub>76</sub> Mo <sub>2</sub> O <sub>10</sub> |
| Formula Weight                                   | 1125.06                                                         | 1125.06                                                         |
| Temperature (K)                                  | 150(2)                                                          | 150(2)                                                          |
| Space Group                                      | Monoclinic, P2 <sub>1</sub> /c                                  | Triclinic, P-1                                                  |
| <i>a</i> (Å)                                     | 9.9404(3)                                                       | 9.8343(2)                                                       |
| <i>b</i> (Å)                                     | 15.7440(4)                                                      | 11.2520(2)                                                      |
| <i>c</i> (Å)                                     | 17.7587(4)                                                      | 15.7140(3)                                                      |
| $\alpha$ (°)                                     |                                                                 | 107.000(1)                                                      |
| $\beta$ (°)                                      | 100.059(1)                                                      | 105.165(1)                                                      |
| $\gamma$ (°)                                     |                                                                 | 90.114(1)                                                       |
| V (Å <sup>3</sup> )                              | 2736.54 (12)                                                    | 1599.14(5)                                                      |
| Z                                                | 2                                                               | 1                                                               |
| D <sub>calcd</sub> (Mg/m <sup>3</sup> )          | 1.365                                                           | 1.168                                                           |
| Crystal Size (mm)                                | 0.38 X 0.19 X 0.19                                              | 0.23 X 0.23 X 0.15                                              |
| Theta range for data collection                  | 1.740 to 27.433°                                                | 1.899 to 27.467°                                                |
| $\mu$ (mm <sup>-1</sup> ) [Mo, K $\alpha$ ]      | 0.514                                                           | 0.440                                                           |
| F(000)                                           | 1176                                                            | 588                                                             |
| Reflections collected                            | 49649                                                           | 46246                                                           |
| Unique reflections                               | 6233 [R(int)= 0.051]                                            | 7310 [R(int)= 0.038]                                            |
| Data Completeness to [ $\theta$ ]                | 100% [25.242]                                                   | 100% [25.242]                                                   |
| Data/restraints/parameters                       | 6233 / 25 / 343                                                 | 7310 / 1 / 326                                                  |
| R1 <sup>a</sup> (%) (all data)                   | 5.06 (7.19)                                                     | 3.79 (4.96)                                                     |
| wR2 <sup>b</sup> (%)(all data)                   | 11.86 (13.19)                                                   | 9.78 (10.38)                                                    |
| Goodness-of-fit on F <sup>2</sup>                | 1.058                                                           | 1.060                                                           |
| Largest diff. peak and hole (e Å <sup>-3</sup> ) | 1.538 and -0.715                                                | 0.559 and -0.477                                                |

$${}^a\mathbf{R1} = \frac{\sum ||F_o| - |F_c||}{\sum |F_o|} \times 100$$

$${}^b\mathbf{wR2} = \left[ \frac{\sum w (F_o^2 - F_c^2)^2}{\sum (w |F_o|^2)^2} \right]^{1/2} \times 100$$
